# Supplementary material for: Transcriptomic Analysis Reveals the Hepatotoxicity of Perfluorooctanoic Acid in Black-Spotted Frogs (Rana nigromaculata)
Source: MDPI journal article supplement (doi:10.3390/d14110971), 2022-11-11
Supplement: s1 [file s1]

## Supplementary Material

### Transcriptomic analysis reveals the hepatotoxicity of perfluoro-octanoic acid in black-spotted frogs (*Rana nigromaculata*)

Huikang Lin <sup>1</sup>, Yixuan Feng <sup>1</sup>, Yueyue Zheng <sup>1</sup>, Yu Han <sup>1,2</sup>, Xia Yuan <sup>1,2</sup>, Panpan Gao <sup>1,2</sup>,

Hangjun Zhang <sup>1,2</sup>, Yuchi Zhong <sup>1,2</sup>, Zhiquan Liu <sup>1,2,\*</sup>

<sup>1</sup> School of Life and Environmental Sciences, Hangzhou Normal University,

Hangzhou 311121, China

<sup>2</sup> School of Engineering, Hangzhou Normal University, Hangzhou 310018, China

\* Correspondence to: Zhiquan Liu, School of Life and Environmental Sciences, Hangzhou

Normal University, Hangzhou 311121, China

Email: liuzhiquan1024@163.com

Table S1. Target gene primer sequences.

| Genes                          | Primer sequences                                              | Product size (bp) |
|--------------------------------|---------------------------------------------------------------|-------------------|
| <i>CYP2G1</i>                  | F: TTGAGAGGCTGCTGGTATTTGTGTC<br>R: AATTCAGAGGCGGGTCTTCATTG    | 136               |
| <i>CYP2A10</i>                 | F: CTGGGTTGAATTTCTGCGGGTTTG<br>R: GCTGCTGAGACTATCGTGTTCCG     | 121               |
| <i>CYP7A1</i>                  | F: CTACGCCTTCTGTTACCGAGTGATG<br>R: CGCTTCTTGCTCTGGCTAGGTTCTTC | 103               |
| <i>CYP2H2</i>                  | F: AATTCGGCACTCGTGGATCTTTACC<br>R: CCTCCATTGATCGCTTACCCATTCC  | 150               |
| <i>RETSAT</i>                  | F: TGCTCAGTCGTTGTCCAATCAGTG<br>R: CAACCTGCCAACCAACATAACCAAAG  | 115               |
| <i>PPAR<math>\gamma</math></i> | F: TTCCTGTGTCGAAATGACCAGATGG<br>R: TGTCTGAGTAGTACGGCGGAGAAG   | 112               |
| <i>CAT</i>                     | F: CCCACAGGGATGAGAGGGTAGTC<br>R: GGTAGCAGGGAAGTGTGCTTACG      | 83                |
| <i>LPL</i>                     | F: GGATGGACGGTAACTGGCATGTATG<br>R: CTGAAACTGGGTAGTGCTGCTGTG   | 133               |
| <i>UGT1A6</i>                  | F: AGCCAGTGACTGCCATCCATAGG<br>R: CCACGCAGCTTTGCTTTCTTCTTG     | 98                |
| <i>TAP1</i>                    | F: GAACCGACCAACCAGCACAGAC<br>R: CCAGACAACGACCACAAGGGATTC      | 138               |
| <i>TAP2</i>                    | F: CATAACCAACATCGCCACCTGAG<br>R: GCAGAAGAGGAGGAGGCAGAGAG      | 145               |
| <i>GP1BA</i>                   | F: GTTCCACGGGTCTCGCCAAG<br>R: CTCGTCCGCAACCTTGTCCATC          | 129               |
| <i>BST1</i>                    | F: TGAGTGGGTGGGTGGCAGATG<br>R: AGTGGGACAGGAGTCGTAGTCAATC      | 80                |
| <i>FABP1</i>                   | F: ATGAGTTCACTATTGGCGTGGAGAC<br>R: CCAGAACTTCAGTGGTGGAGGTC    | 133               |
| <i>TRIM25</i>                  | F: CCTGTACCTGCTGTGAAATCCTGTC<br>R: GTTGGGATGACTTGCTGTGGACTC   | 85                |
| <i>GAPDH</i>                   | F: TGGCATTGTGGAGGCGTTGATG<br>R: GGTGGATGCTGGGATGATGTTCTG      | 130               |
